# Supplementary material
Source: MDPI journal article supplement (https://www.mdpi.com/2227-9040/12/3/30)
Supplement: s1 [file s1]

## Supplementary Material

# Gas and Liquid Chromatography Mass Spectrometry as a Tool for Elucidating Volatile Organic Compounds (VOCs) and Metabolites in Maternal Milk: A Perspective on Infants' Health Risk Assessment

Evangelia N. Tzanetou <sup>1,\*</sup>, Electra Manea-Karga <sup>2</sup>, Eirini Baira <sup>2</sup>, Theodora Boutsikou <sup>3</sup>, Zoi Iliodromiti <sup>3</sup>, Nicoletta Iacovidou <sup>3</sup>, Kyriaki Machera <sup>2</sup> and Konstantinos M. Kasiotis <sup>2,\*</sup>

<sup>1</sup> Laboratory of Chemical Control of Pesticides, Benaki Phytopathological Institute, 8 Stefanou Delta Str., 14561 Athens, Greece

<sup>2</sup> Laboratory of Pesticides' Toxicology, Benaki Phytopathological Institute, 8 Stefanou Delta Str., 14561 Athens, Greece; e.manea-karga@bpi.gr (E.M.-K.); e.baira@bpi.gr (E.B.); k.machera@bpi.gr (K.M.)

<sup>3</sup> Neonatal Department, Aretaieio Hospital, Medical School, National and Kapodistrian University of Athens, 11528 Athens, Greece; theobtsk@gmail.com (T.B.); ziliodromiti@yahoo.gr (Z.I.); niciac58@gmail.com (N.I.)

\* Correspondence: ev.tzanetou@bpi.gr (E.N.T.); k.kasiotis@bpi.gr (K.M.K.); Tel.: +30-2108180-357 (E.N.T. & K.M.K.)

## Contents

**Table S1.** Accuracy (mean recovery, n=5) and precision (n=5) at 3×LLOQ, 30×LLOQ and ULOQ

**Table S2.** Accuracy (mean recovery, n=5) and precision (n=5) concerning the back-calculated concentrations of the calibration standards at LLOQ, 3×LLOQ, 30×LLOQ and ULOQ

**Table S3.** Exemplary MS fragments, retention time and (RT) retention index (RI) for selected detected identified compounds

**Figure S1.** GC-MS full-scan spectra of citronellol in positive maternal milk samples (the above spectra correspond to those obtained in the maternal milk samples, while the spectra below correspond to those of the NIST library)

**Figure S2.** GC-MS full-scan spectra of 4,4'-(1,3-dimethylbutylidene)bisphenol in positive maternal milk samples (the above spectra correspond to those obtained in the maternal milk samples, while the spectra below correspond to those of the NIST library)

**Figure S3.** SRM transitions for benzene (a) and styrene (b) in standard mix at 10 ng mL<sup>-1</sup>

**Table S1.** Accuracy (mean recovery, n=5) and precision (n=5) at 3×LLOQ, 30×LLOQ and ULOQ.

| Compound                | LLOQ (ng mL <sup>-1</sup> ) | Mean Recovery (3×LLOQ) ±RSD % | Precision (3×LLOQ) %CV | Mean Recovery (30×LLOQ) ±RSD % | Precision (30×LLOQ) %CV | Mean Recovery (ULOQ) ±RSD % | Precision (ULOQ) %CV |
|-------------------------|-----------------------------|-------------------------------|------------------------|--------------------------------|-------------------------|-----------------------------|----------------------|
| Isoprene                | 0.1                         | 82±14                         | 10                     | 87±13                          | 12                      | 90±10                       | 7                    |
| 2-Methyl pentane        | 1                           | 82±13                         | 11                     | 91±7                           | 11                      | 86±8                        | 4                    |
| Methyl tert-butyl-ether | 1                           | 83±8                          | 8                      | 88±11                          | 8                       | 87±13                       | 5                    |
| Hexane                  | 0.5                         | 91±15                         | 7                      | 86±8                           | 11                      | 82±14                       | 12                   |
| Dichloromethane         | 0.2                         | 92±10                         | 9                      | 90±14                          | 10                      | 88±7                        | 15                   |
| Tetrahydrofuran         | 1                           | 98±9                          | 12                     | 91±15                          | 7                       | 81±9                        | 8                    |
| Benzene                 | 0.2                         | 81±11                         | 15                     | 85±11                          | 7                       | 90±12                       | 9                    |
| Heptane                 | 0.5                         | 84±9                          | 13                     | 82±7                           | 12                      | 85±14                       | 14                   |
| Octane                  | 0.2                         | 91±11                         | 9                      | 83±10                          | 11                      | 86±8                        | 8                    |
| 2,2,4-Trimethyl pentane | 1                           | 85±12                         | 6                      | 91±11                          | 7                       | 94±9                        | 10                   |
| Toluene                 | 0.2                         | 91±14                         | 12                     | 94±10                          | 12                      | 92±13                       | 10                   |
| 1,3-Dichloropropene     | 1                           | 85±11                         | 12                     | 79±11                          | 16                      | 88±8                        | 15                   |
| 1,1,2-Trichloroethane   | 1                           | 90±13                         | 10                     | 81±12                          | 9                       | 84±10                       | 14                   |
| Tetrachloroethylene     | 0.5                         | 82±13                         | 8                      | 93±9                           | 7                       | 93±9                        | 4                    |
| Chlorobenzene           | 0.5                         | 92±12                         | 13                     | 91±12                          | 12                      | 90±10                       | 13                   |
| Ethyl benzene           | 0.5                         | 85±9                          | 15                     | 88±12                          | 13                      | 87±5                        | 11                   |
| p-Xylene                | 0.2                         | 89±10                         | 12                     | 87±10                          | 6                       | 91±12                       | 4                    |
| m-Xylene                | 0.2                         | 89±11                         | 11                     | 81±12                          | 5                       | 80±5                        | 7                    |
| o-Xylene                | 0.5                         | 93±9                          | 10                     | 87±8                           | 4                       | 83±11                       | 5                    |
| Styrene                 | 0.2                         | 84±9                          | 5                      | 89±10                          | 11                      | 82±5                        | 6                    |
| 1,2,4-Trimethyl benzene | 0.5                         | 92±10                         | 6                      | 92±11                          | 10                      | 94±7                        | 12                   |
| 1,2,3-Trimethyl benzene | 0.5                         | 87±11                         | 6                      | 91±13                          | 8                       | 90±8                        | 10                   |
| p-Dichlorobenzene       | 0.2                         | 87±15                         | 9                      | 88±9                           | 14                      | 80±12                       | 15                   |
| 1,2-Dichloroethene      | 1                           | 77±10                         | 10                     | 83±11                          | 12                      | 88±9                        | 15                   |
| 1,2-Dichloroethane      | 1                           | 86±8                          | 13                     | 88±9                           | 8                       | 91±6                        | 5                    |
| Metabolite              | LLOQ (ng mL <sup>-1</sup> ) | Mean Recovery (3×LLOQ) ±RSD % |                        | Mean Recovery (30×LLOQ) ±RSD % |                         | Mean Recovery (ULOQ) ±RSD % |                      |
| DL-MA                   | 0.5                         | 90±12                         | 12                     | 87±11                          | 12                      | 89±13                       | 9                    |
| R-MA                    | 0.5                         | 94±9                          | 11                     | 82±8                           | 13                      | 90±14                       | 10                   |
| PGA                     | 0.4                         | 85±10                         | 5                      | 87±11                          | 10                      | 87±12                       | 7                    |
| 2-MHA                   | 0.4                         | 81±12                         | 7                      | 87±12                          | 9                       | 88±8                        | 5                    |
| 3-MHA                   | 0.4                         | 90±12                         | 12                     | 82±8                           | 15                      | 87±11                       | 13                   |
| 4-MHA                   | 0.4                         | 85±12                         | 10                     | 83±7                           | 9                       | 88±7                        | 11                   |
| BMA                     | 0.2                         | 90±9                          | 7                      | 92±15                          | 6                       | 87±11                       | 4                    |
| PMA                     | 0.2                         | 92±11                         | 8                      | 87±9                           | 11                      | 94±9                        | 7                    |
| HA                      | 0.4                         | 106±14                        | 8                      | 101±10                         | 16                      | 98±14                       | 12                   |

**Table S2.** Accuracy (mean recovery, n=5) and precision (n=5) concerning the back-calculated concentrations of the calibration standards at LLOQ, 3×LLOQ, 30×LLOQ and ULOQ.

| Compound                 | Mean Recovery (LLOQ) ±RSD % | Precision (LLOQ) %CV | Mean Recovery (3×LLOQ) ±RSD % | Precision (3×LLOQ) %CV | Mean Recovery (30×LLOQ) ±RSD % | Precision (30×LLOQ) %CV | Mean Recovery (ULOQ) ±RSD % | Precision (ULOQ) %CV |
|--------------------------|-----------------------------|----------------------|-------------------------------|------------------------|--------------------------------|-------------------------|-----------------------------|----------------------|
| Isoprene                 | 81±9                        | 8                    | 82±14                         | 10                     | 87±13                          | 12                      | 90±10                       | 7                    |
| 2-Methyl pentane         | 87±9                        | 10                   | 82±13                         | 11                     | 91±7                           | 11                      | 86±8                        | 4                    |
| Methyl tert-butyl-ether  | 83±9                        | 12                   | 83±8                          | 8                      | 88±11                          | 8                       | 87±13                       | 5                    |
| Hexane                   | 92±13                       | 18                   | 91±15                         | 7                      | 86±8                           | 11                      | 82±14                       | 12                   |
| Dichloro-methane         | 93±11                       | 15                   | 92±10                         | 9                      | 90±14                          | 10                      | 88±7                        | 14                   |
| Tetrahydrofuran          | 101±9                       | 9                    | 98±9                          | 12                     | 91±15                          | 7                       | 81±9                        | 8                    |
| Benzene                  | 80±9                        | 7                    | 81±11                         | 15                     | 85±11                          | 7                       | 92±12                       | 9                    |
| Heptane                  | 83±12                       | 14                   | 84±9                          | 13                     | 82±7                           | 12                      | 85±12                       | 14                   |
| Octane                   | 87±11                       | 11                   | 91±11                         | 9                      | 83±10                          | 11                      | 86±8                        | 8                    |
| 2,2,4-Tri-methyl pentane | 92±8                        | 14                   | 83±12                         | 6                      | 91±11                          | 7                       | 94±9                        | 10                   |
| Toluene                  | 91±9                        | 16                   | 90±14                         | 14                     | 94±10                          | 12                      | 92±13                       | 10                   |
| cis-1,3-Dichloropropene  | 80±7                        | 15                   | 82±11                         | 14                     | 79±11                          | 14                      | 88±8                        | 15                   |
| 1,1,2-Tri-chloro-ethane  | 81±9                        | 15                   | 90±13                         | 10                     | 81±12                          | 9                       | 84±10                       | 14                   |
| Tetrachloroethylene      | 85±6                        | 18                   | 82±13                         | 8                      | 93±9                           | 7                       | 93±9                        | 4                    |
| Chlorobenzene            | 91±7                        | 7                    | 92±12                         | 13                     | 87±12                          | 12                      | 95±7                        | 13                   |
| Ethyl benzene            | 89±10                       | 12                   | 85±9                          | 14                     | 88±12                          | 13                      | 87±5                        | 11                   |
| p-Xylene                 | 81±11                       | 8                    | 91±10                         | 12                     | 88±8                           | 6                       | 91±12                       | 4                    |
| m-Xylene                 | 89±14                       | 6                    | 87±8                          | 11                     | 81±12                          | 9                       | 80±8                        | 7                    |
| o-Xylene                 | 91±8                        | 12                   | 93±9                          | 10                     | 87±8                           | 4                       | 83±11                       | 5                    |
| Styrene                  | 84±8                        | 15                   | 84±9                          | 5                      | 89±10                          | 11                      | 82±5                        | 6                    |
| 1,2,4-Tri-methyl benzene | 90±10                       | 6                    | 91±7                          | 6                      | 92±11                          | 10                      | 94±7                        | 12                   |
| 1,2,3-Tri-methyl benzene | 89±14                       | 7                    | 87±11                         | 6                      | 91±13                          | 8                       | 90±8                        | 10                   |
| p-Dichlorobenzene        | 83±8                        | 16                   | 87±15                         | 9                      | 88±9                           | 12                      | 80±12                       | 12                   |

| 1,2-Dichloroethene | 80±9                        | 17                   | 77±10                         | 10                     | 85±11                          | 12                      | 91±12                       | 13                   |
|--------------------|-----------------------------|----------------------|-------------------------------|------------------------|--------------------------------|-------------------------|-----------------------------|----------------------|
| 1,2-Dichloroethane | 81±8                        | 12                   | 86±8                          | 13                     | 88±9                           | 8                       | 91±6                        | 5                    |
| Metabolite         | Mean Recovery (LLOQ) ±RSD % | Precision (LLOQ) %CV | Mean Recovery (3×LLOQ) ±RSD % | Precision (3×LLOQ) %CV | Mean Recovery (30×LLOQ) ±RSD % | Precision (30×LLOQ) %CV | Mean Recovery (ULOQ) ±RSD % | Precision (ULOQ) %CV |
| DL-MA              | 84±15                       | 15                   | 85±12                         | 12                     | 87±11                          | 12                      | 89±9                        | 10                   |
| R-MA               | 87±14                       | 14                   | 91±10                         | 10                     | 82±8                           | 13                      | 90±14                       | 10                   |
| PGA                | 91±10                       | 7                    | 83±14                         | 9                      | 87±11                          | 10                      | 87±12                       | 7                    |
| 2-MHA              | 80±11                       | 9                    | 86±12                         | 9                      | 87±12                          | 9                       | 88±8                        | 5                    |
| 3-MHA              | 85±8                        | 10                   | 90±12                         | 12                     | 87±13                          | 13                      | 87±11                       | 14                   |
| 4-MHA              | 91±11                       | 8                    | 85±12                         | 10                     | 83±6                           | 9                       | 93±7                        | 11                   |
| BMA                | 86±12                       | 6                    | 90±9                          | 7                      | 92±15                          | 6                       | 87±8                        | 4                    |
| PMA                | 82±5                        | 11                   | 92±11                         | 8                      | 87±9                           | 11                      | 94±9                        | 7                    |
| HA                 | 86±7                        | 8                    | 106±14                        | 8                      | 98±10                          | 16                      | 101±16                      | 13                   |

**Table S3.** Exemplary MS fragments, retention time (RT) and retention index (RI) for selected detected identified compounds.

| Compound                                | MS Fragments            | RT (min) | RI*        |
|-----------------------------------------|-------------------------|----------|------------|
| 4-Mercaptophenol                        | 126, 97, 53             | 17.78    | 1217       |
| Citronellol                             | 95, 69, 55, 41          | 18.59    | 1240(1232) |
| Diisobutyl phthalate                    | 149, 121, 104, 76       | 30.85    | 1871(1869) |
| Phthalic acid, isobutyl neopentyl ester | 223, 149, 167, 104      | 36.53    | 1968       |
| 4,4'-(1,3-Dimethylbutylidene)bisphenol  | 213, 165, 152, 119      | 40.31    | 2287       |
| Bisphenol B, acetate                    | 213, 165, 152, 119, 107 | 40.37    | 2294       |
| Phthalic acid, decyl neopentyl ester    | 167, 149, 71            | 43.42    | 2639       |

\* RI, retention index on Mega-5HT (30 m, 0.25 mm, 0.25 µm) column (relative to *n*-alkanes), identification based on mass spectra comparison with the reference databases and comparison (where applicable) with literature RIs (depicted in parentheses).

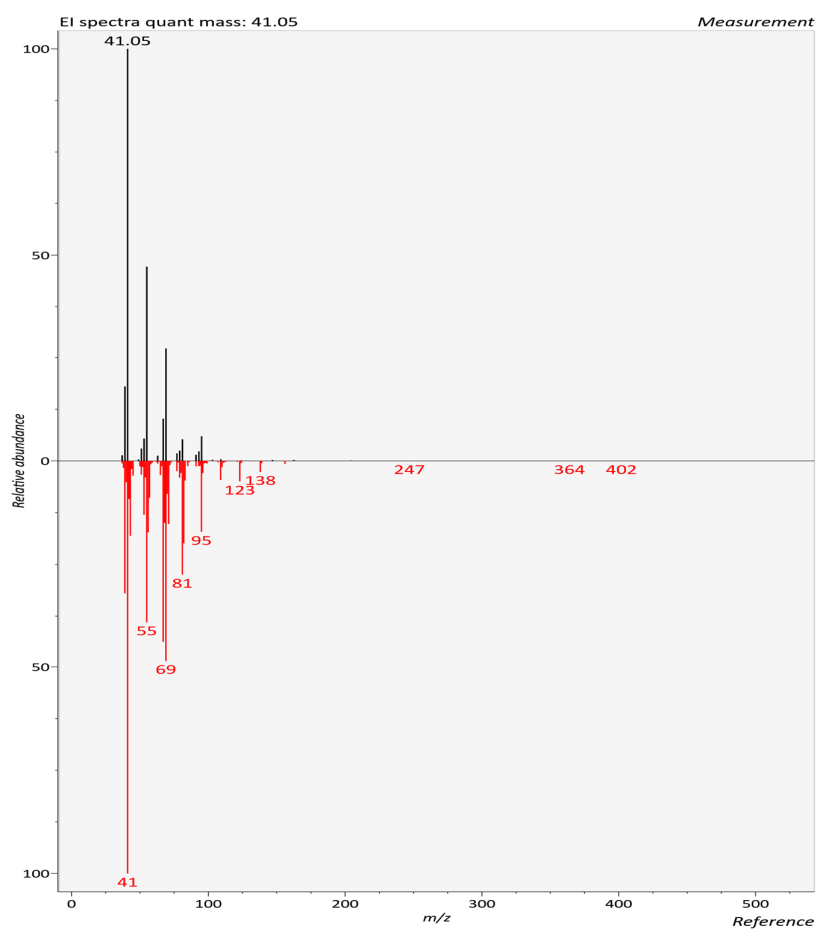

**Figure S1.** GC-MS full-scan spectra of citronellol in positive maternal milk sample (the top spectra corresponds to the one obtained in the maternal milk sample, while the spectra below corresponds to the respective of the NIST library).

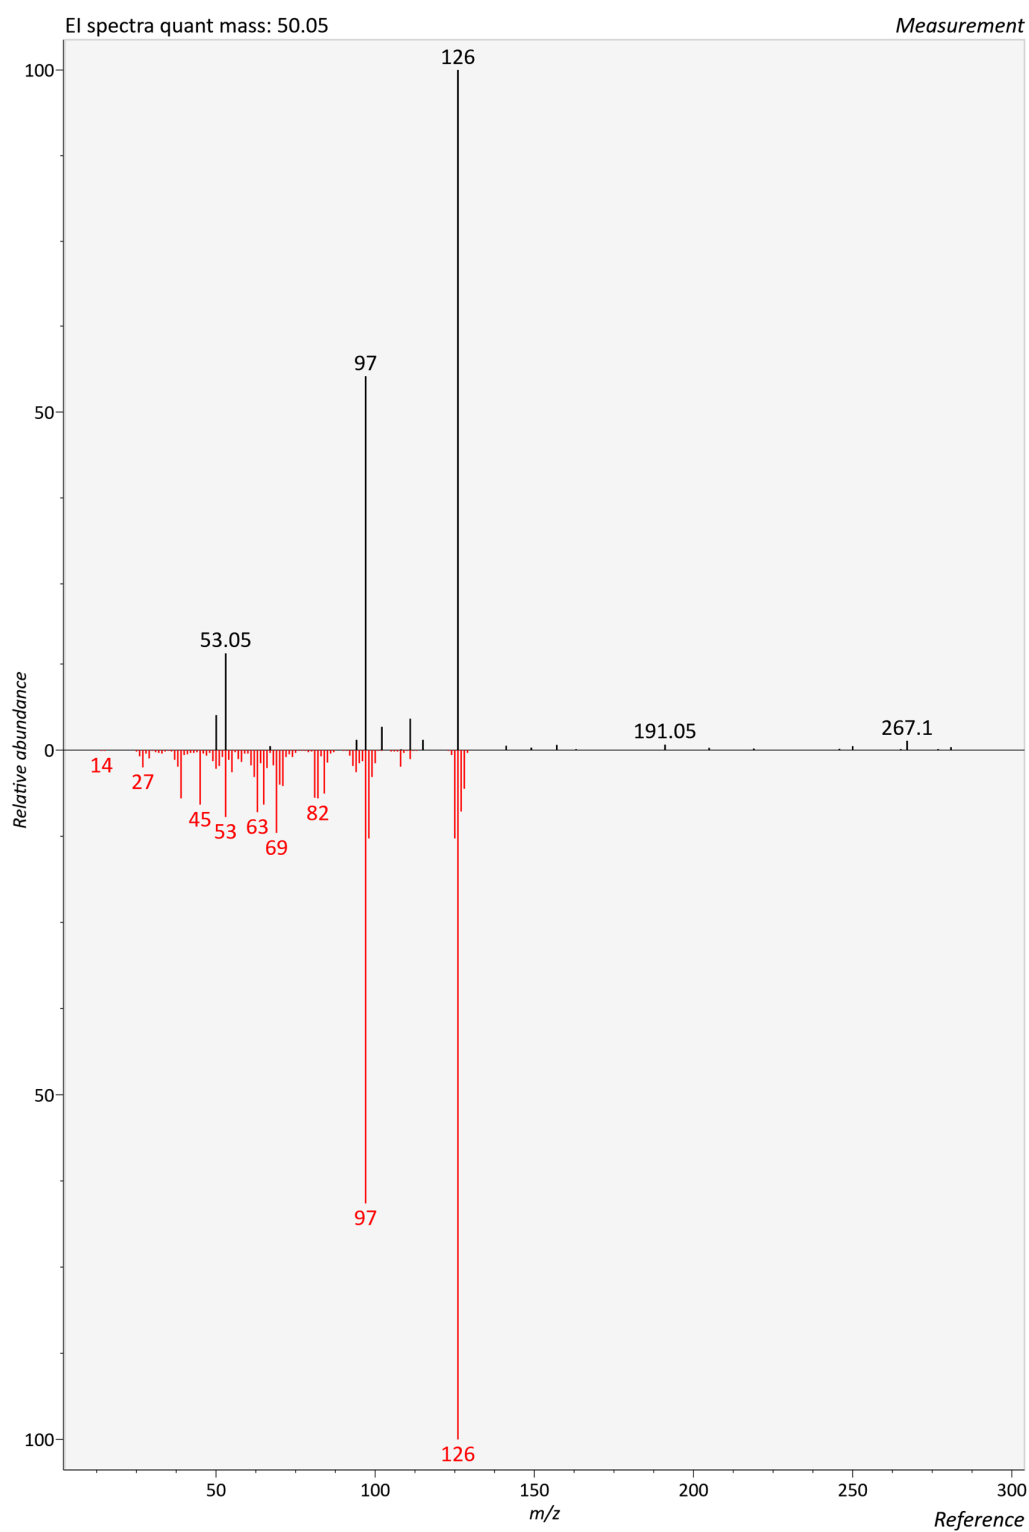

**Figure S2.** GC-MS full-scan spectra of 4-mercaptophenol in positive maternal milk sample (the top spectra corresponds to the one obtained in the maternal milk sample, while the spectra below corresponds to the respective of the NIST library).

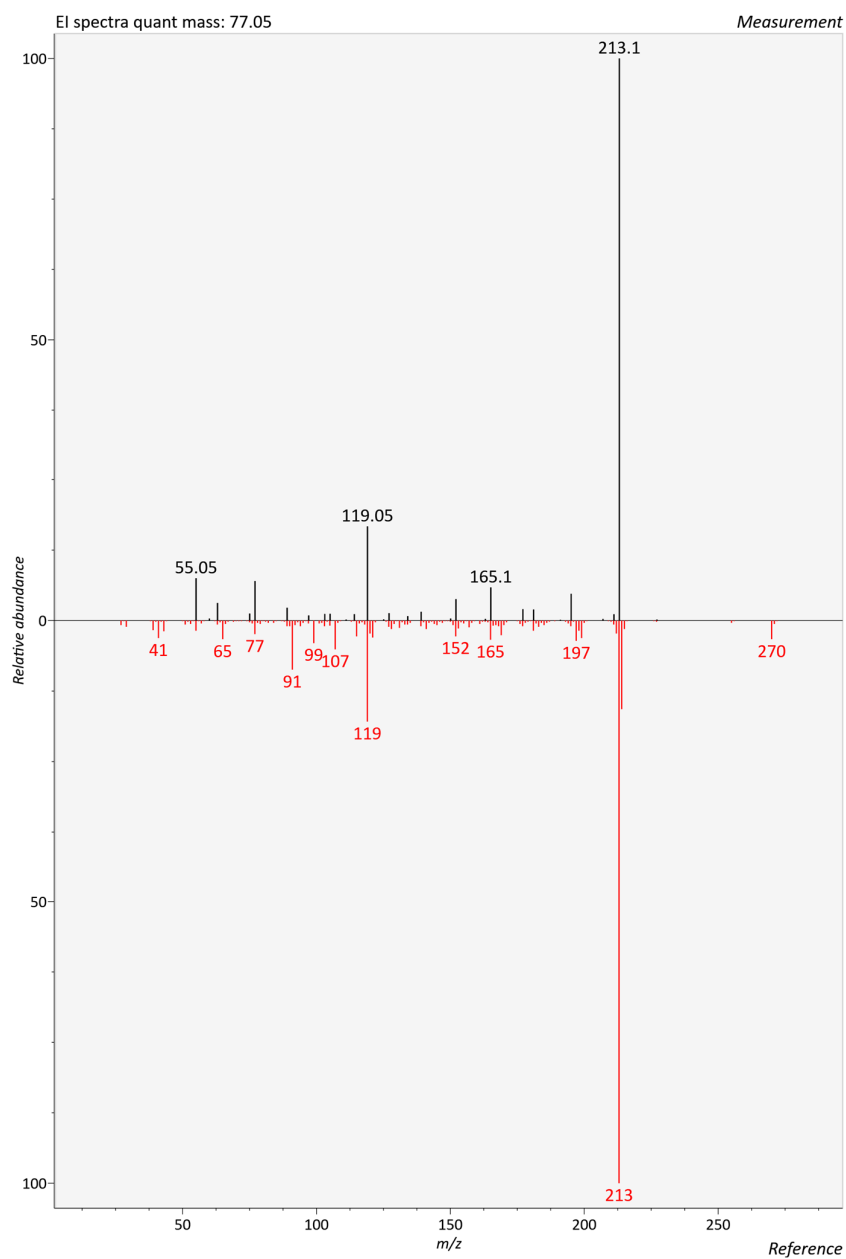

**Figure S3.** GC-MS full-scan spectra of 4,4'-(1,3-dimethylbutylidene)bisphenol in positive maternal milk sample (the top spectra corresponds to the one obtained in the maternal milk samples, while the spectra below corresponds to the respective of the NIST library).

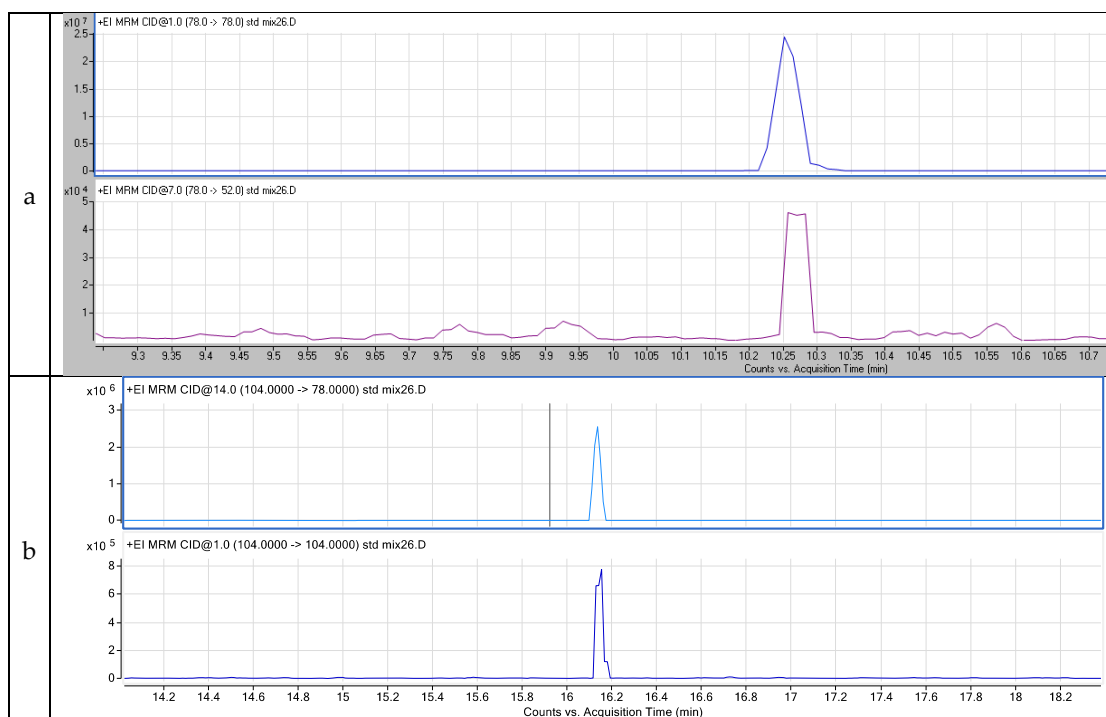

**Figure S4.** SRM transitions for benzene (a) and styrene (b) in standard mix in CS<sub>2</sub> at 10 ng mL<sup>-1</sup>.
